# Supplementary material for: Positive autoregulation oflag-1in response to LIN-12 activation in cell fate decisions duringC. elegansreproductive system development
Source: Oxford University Press journal article supplement (doi:10.1242/dev.193482), 2020-01-01
Supplement: dev193482supp.pdf [file dev193482supp.pdf]

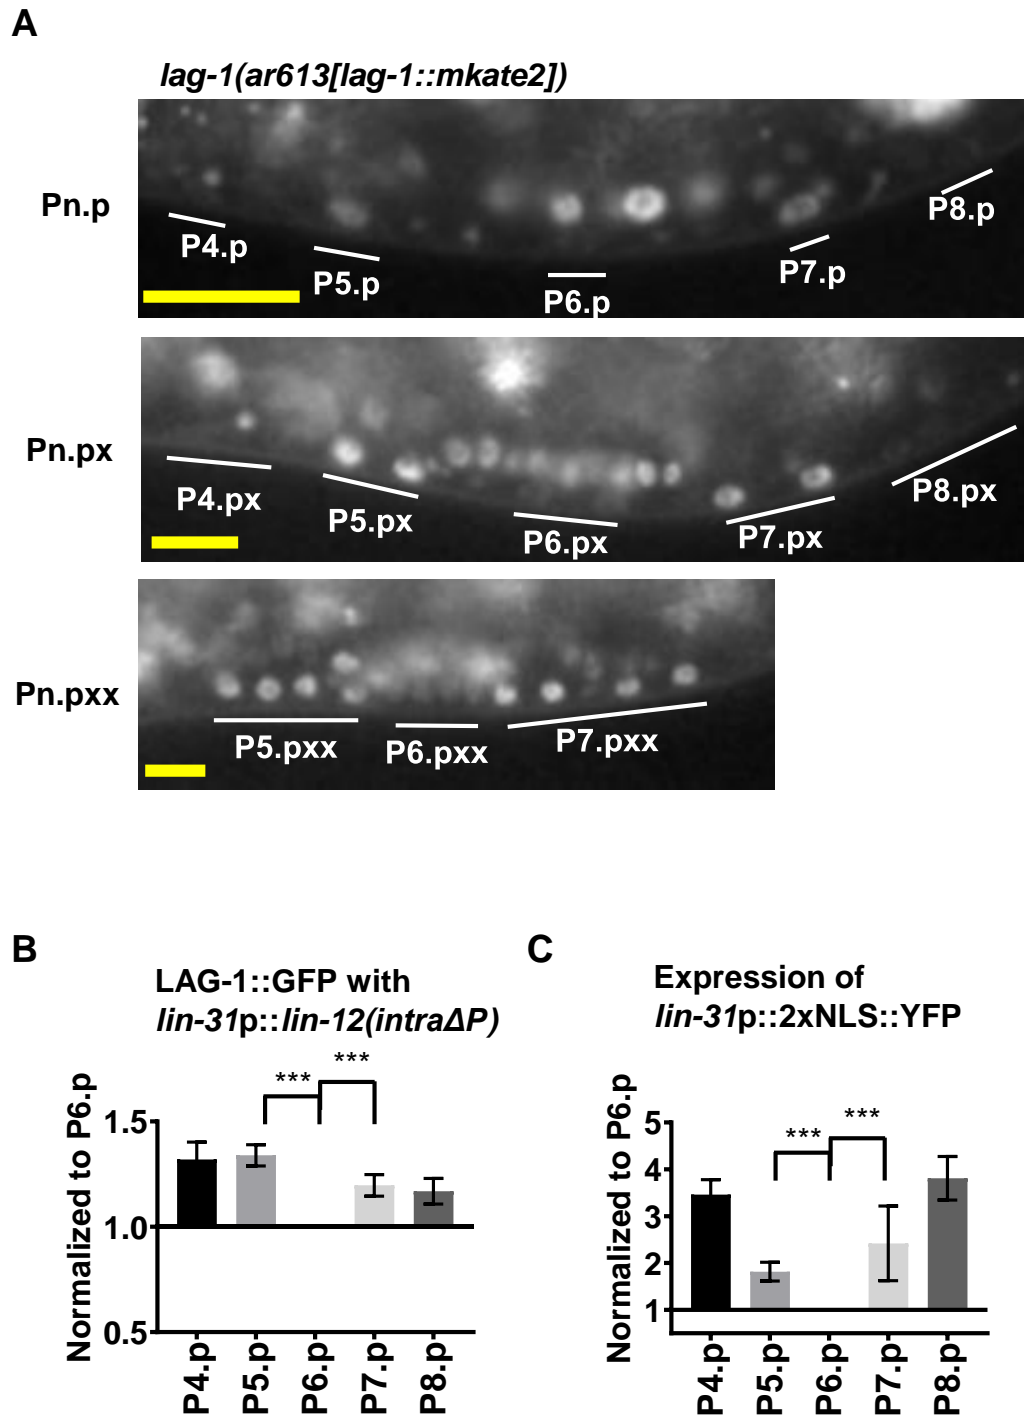

**Figure S1.** *lag-1(ar613[lag-1::mKate2])* expression, and additional data relevant to Figure 1.

(A) Representative image of *lag-1(ar613[lag-1::mKate2])* from L3 Pn.p stage to L3 Pn.pxx stage. VPCs are underlined and labeled. Scale bar (yellow) = 10  $\mu$ m.

(B) LAG-1::GFP expression in the presence of *arTi102[lin-31p::lin-12(intraΔP)]* (data from Fig. 1D), here normalized to P6.p. Although expression is significantly higher in P5.p and P7.p compared to P6.p, this result is difficult to interpret because of patterned variation in expression that is evident upon quantification of a *lin-31p* transgene in (C). \*\*\* $p < 0.01$

(C) Quantification of expression from *arTi88[lin-31p::2xNLS::YFP]* during the L3 stage shows patterned variation in expression. Expression is significantly higher in P5.p and P7.p compared to P6.p, suggesting that *lin-31p* itself is affected by spatial patterning signals. \*\*\* $p < 0.01$

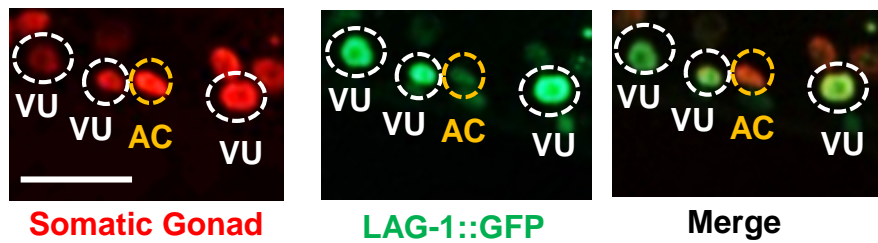

**Figure S2. LAG-1::GFP in the somatic gonad**

Orthogonal projection of the somatic gonad, in which the AC and VUS have already been specified. (Left) Somatic gonad is marked by *arTi112[ckb-3p::mCherry::H2B]*. (Middle) LAG-1::GFP is preferentially expressed in specified VUs. (Right) Merge. Scale bar = 10  $\mu$ m.

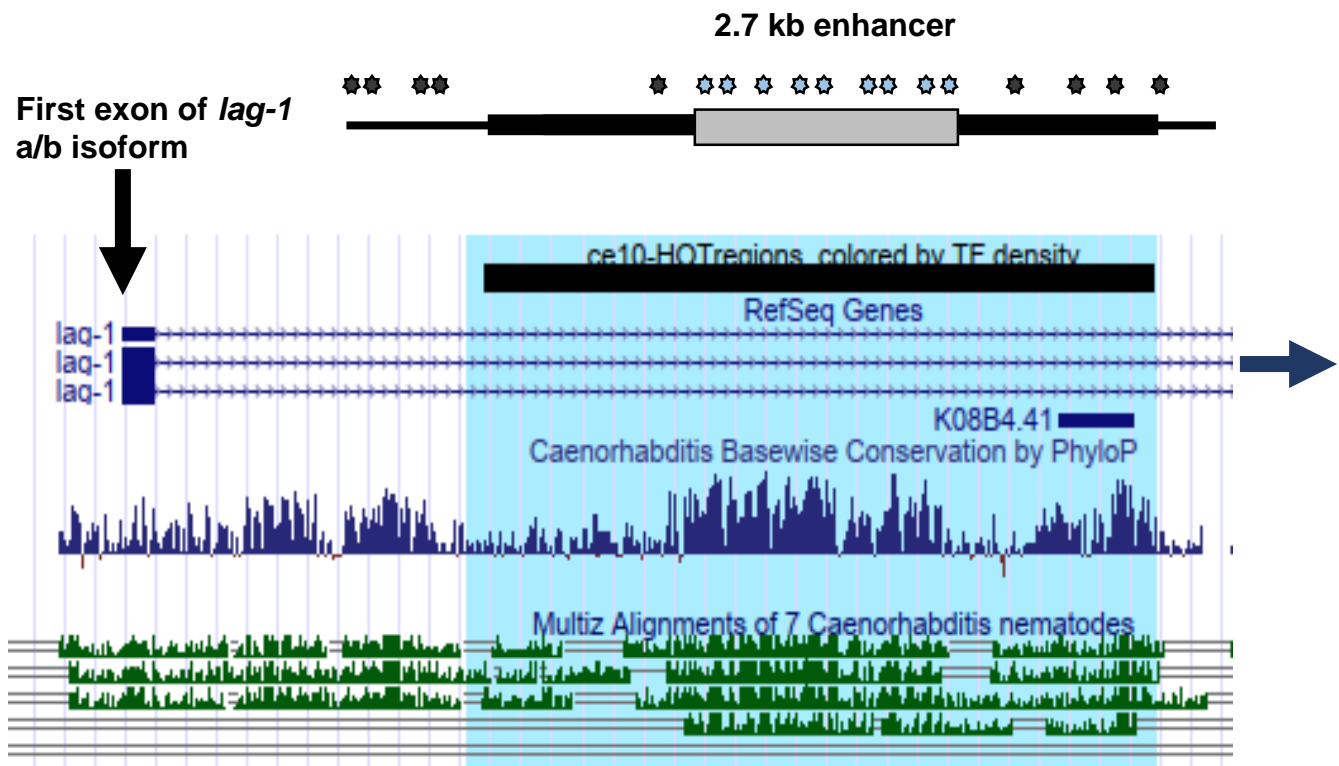

**Figure S3. UCSC genome browser view of *lag-1* region used to generate the 2.7 kb enhancer.** HOT region track (in black) is provided by Wreczycka, et al. (2019). Conservation tracks are shown in green.

## Figure S4

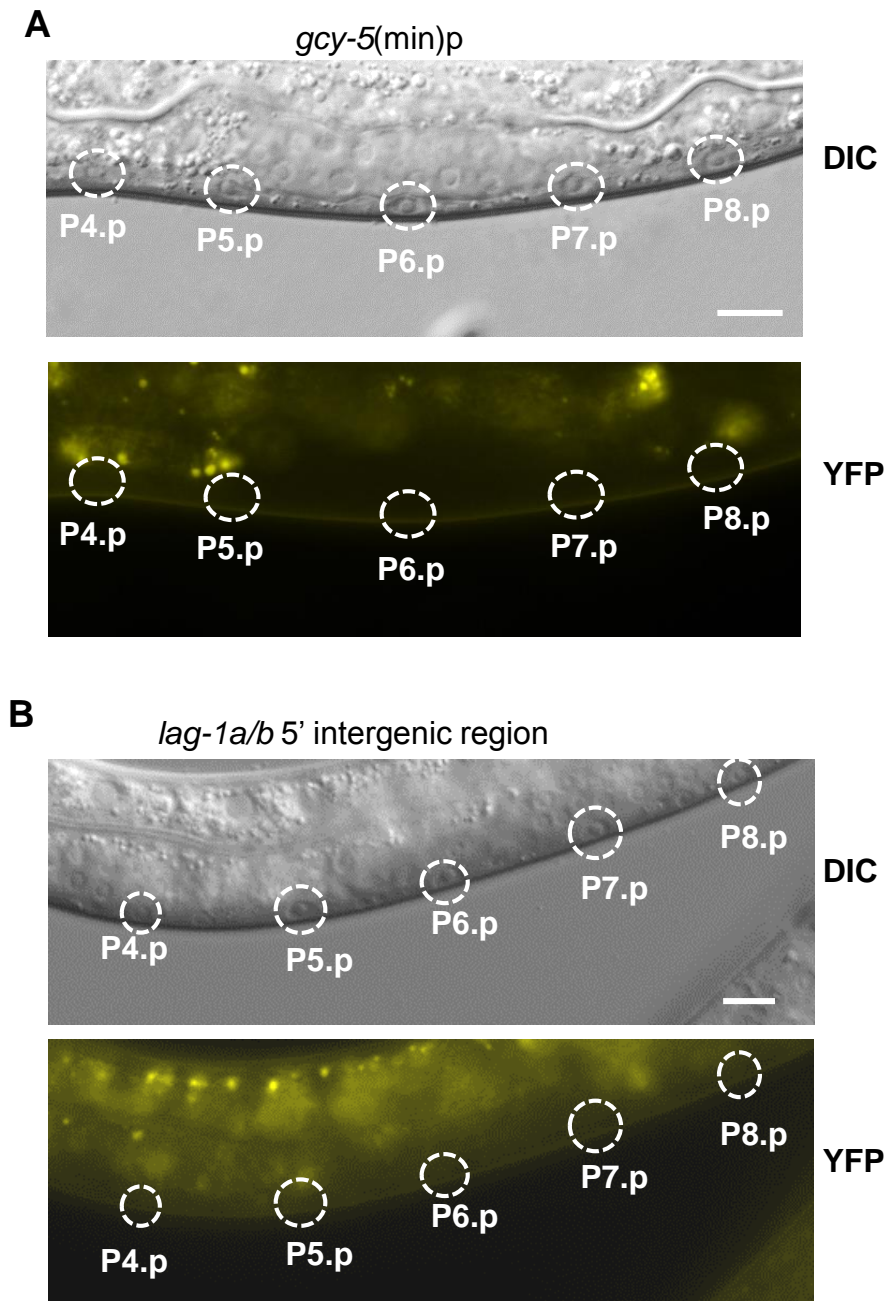

**Figure S4.** The *gcy-5* minimal promoter and the *lag-1 a/b 5'* intergenic region do not result in detectable YFP expression in VPCs.

(A) Representative image of a transgene inserted in the LG I containing only [*gcy-5(min)p::2xNLS::YFP*]. No expression was observed in the L3 VPCs.

(B) Representative image of the intergenic region 5' to the *lag-1* ATG (of isoforms a/b) fused to *2xnl5-yfp*. No expression was observed in the L3 VPCs.

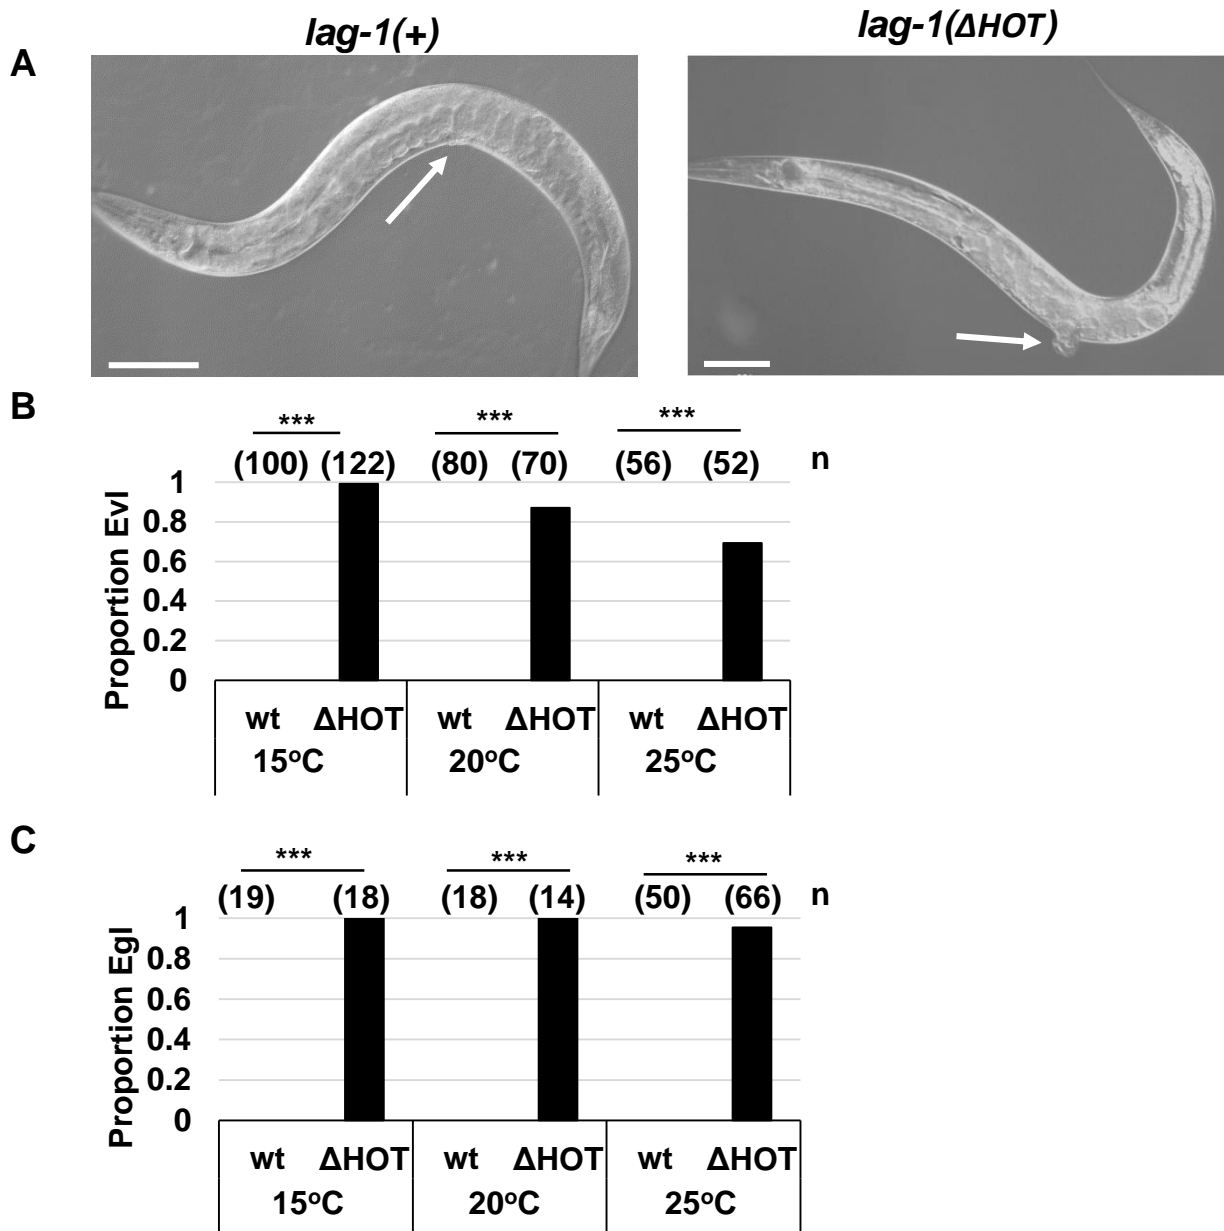

**Figure S5. Deletion of the HOT region results in an egg-laying defective (Egl) phenotype and a cold-sensitive abnormal vulval eversion (Evi) phenotype.** In addition, no difference in AC marker expression was observed between *lag-1::gfp* and *lag-1(ΔHOT)::gfp*.

(A) Representative images of adult hermaphrodite of *lag-1::gfp* compared to *lag-1(ΔHOT)::gfp*. Scale bar denotes 100 μm.

(B) Temperature dependence of the Evi phenotype. All comparisons between *lag-1::gfp* and *lag-1(ΔHOT)::gfp* were significant ( $p < 0.001$ , Fisher's Exact Test).

(C) Temperature dependence of the Egl phenotype. All comparisons between *lag-1::gfp* and *lag-1(ΔHOT)::gfp* were significant ( $p < 0.001$ , Fisher's Exact Test).

**Table S1**

| <b>Strain List</b> |                                                                                                  |
|--------------------|--------------------------------------------------------------------------------------------------|
| <b>Strain</b>      | <b>Genotype</b>                                                                                  |
| GS8732             | <i>lag-1(ar611[lag-1::gfp]); jccTi1[lin-31p::mCherry::H2B]</i>                                   |
| GS8762             | <i>arTi102[lin-31p::lin-12(intraΔP)] lag-1(ar611[lag-1::gfp]); jccTi1[lin-31p::mCherry::H2B]</i> |
| GS9052             | <i>lin-12(n941); lag-1(ar611[lag-1::gfp]); jccTi1[lin-31p::mCherry::H2B]; arEx1442</i>           |
| GS9122             | <i>hlh-2(ar614); lag-1(ar611[lag-1::gfp]); jccTi1[lin-31p::mCherry::H2B]</i>                     |
| GS8555             | <i>lag-1(ar613[lag-1::mKate2])</i>                                                               |
| GS9295             | <i>lag-1(ar611[lag-1::gfp]) jls3900[hlh-8p::NLS::mCherry]</i>                                    |
| GS9047             | <i>lag-1(ar611[lag-1::gfp]); arTi112[ckb-3p::mCherry::H2B]</i>                                   |
| GS9233             | <i>arSi35; jccTi1[lin-31p::mCherry::H2B]</i>                                                     |
| GS9236             | <i>arSi59; jccTi1[lin-31p::mCherry::H2B]</i>                                                     |
| GS9252             | <i>arSi60; jccTi1[lin-31p::mCherry::H2B]</i>                                                     |
| GS9235             | <i>arSi55; jccTi1[lin-31p::mCherry::H2B]</i>                                                     |
| GS9179             | <i>arSi53</i>                                                                                    |
| GS9181             | <i>arSi55</i>                                                                                    |
| GS9264             | <i>arSi74</i>                                                                                    |
| GS9296             | <i>arSi81</i>                                                                                    |
| GS9354             | <i>arSi59; arTi145[ckb-3p::mCherry::H2B]</i>                                                     |
| GS9355             | <i>arSi60; arTi145[ckb-3p::mCherry::H2B]</i>                                                     |
| GS9293             | <i>arSi59; jls3900[hlh-8p::NLS::mCherry]</i>                                                     |
| GS9294             | <i>arSi60; jls3900[hlh-8p::NLS::mCherry]</i>                                                     |
| GS9397             | <i>lag-1(ar611ar647); jccTi1[lin-31p::mCherry::H2B]</i>                                          |
| GS9441             | <i>lag-1(ar611ar647[lag-1(ΔHOT)::gfp]); arls222[lag-2p::2xNLS::tagRFP]</i>                       |
| GS9442             | <i>lag-1(ar611[lag-1::gfp]); arls222[lag-2p::2xNLS::tagRFP]</i>                                  |
| GS8741             | <i>lag-1(ar613[lag-1::mKate2]); arTi22[hlh-2(prox)p::gfp::h2b]</i>                               |

**Table S2**

| <b>Targeting sequence used for CRISPR/Cas9</b> |                                               |
|------------------------------------------------|-----------------------------------------------|
| <b>Target</b>                                  | <b>Sequence</b>                               |
| <i>lag-1::gfp</i> insertion                    | ATGGTGTCTGCTACTCGTC                           |
| <i>lag-1</i> C-terminal insertions             | CGAGAGTGGAACTAGTAAT                           |
| <i>lag-1</i> HOT deletion                      | TTGAGGTTCCCATGATGCTC,<br>GTATAATCCGTTGAAGATTG |

**Table S3**

| <b>Primers for homology template</b>               |                                                                           |                                                                                                                           |
|----------------------------------------------------|---------------------------------------------------------------------------|---------------------------------------------------------------------------------------------------------------------------|
| <b>Target</b>                                      | <b>F</b>                                                                  | <b>R</b>                                                                                                                  |
| <i>lag-1::gfp</i> insertion 5' homology arm        | TTCAGTTGACGACGAACGT<br>GG                                                 | final codon of <i>lag-1</i> ( <i>lag-1</i> Sarov fosmid was used as the template so C-terminal GFP was used for R primer) |
| <i>lag-1::gfp</i> insertion 3' homology arm        | GACATGATGTATCTCGGAT<br>TTTGTGGAAC                                         | GCTTGTTGTTCTCATCTCTGCCA<br>C                                                                                              |
| <i>lag-1</i> C-terminal insertions 5' homology arm | AGGACAACCGGCGATGTT<br>GAG                                                 | GTAATTGGACACAATTCTGCACG<br>GTC                                                                                            |
| <i>lag-1</i> C-terminal insertions 3' homology arm | TAGATTCCACTCTCGCGGG<br>ATTACTG                                            | GAATCGGATGCGTGGATAGTTGA<br>TAATTTATCTG                                                                                    |
| <i>lag-1</i> HOT deletion ssODN repair             | CGGAAGTACAGCTAAAATGTGTGAGATCTAGGTTAGTTCCCATG<br>ATGCTCTGGGCAATTCGCACATGAC |                                                                                                                           |

**Table S4**

| <b>Transgenes made using <i>ttTi4348</i></b> |                        |                                                                               |                |               |
|----------------------------------------------|------------------------|-------------------------------------------------------------------------------|----------------|---------------|
| <b>Strain</b>                                | <b>Genotype</b>        | <b><i>ttTi4348</i> Transgene</b>                                              | <b>Plasmid</b> | <b>Figure</b> |
| GS9233                                       | <i>arSi35; jccTi1</i>  | lag-1 enhancer (2.7kb) + gcy-5(min)p::2xnl-s-yfp                              | pKL77          | 4B            |
| GS8999                                       | <i>arSi35</i>          |                                                                               |                | 4E            |
| GS9236                                       | <i>arSi59; jccTi1</i>  | lag-1 enhancer (1.6kb) + gcy-5(min)p::2xnl-s-yp                               | pKL107         | 4C            |
| GS9293                                       | <i>arSi59; jjs3900</i> |                                                                               |                | 5A            |
| GS9354                                       | <i>arSi59; arTi145</i> |                                                                               |                | 5B            |
| GS9252                                       | <i>arSi60; jccTi1</i>  | lag-1 enhancer (1.6kb $\Delta$ LBS) + gcy-5(min)p::2xnl-s-yfp                 | pKL108         | 4D            |
| GS9355                                       | <i>arSi60; arTi145</i> |                                                                               |                | 5C            |
| GS9294                                       | <i>arSi60; jjs3900</i> |                                                                               |                | 5D            |
| GS9264                                       | <i>arSi74</i>          | lag-1 enhancer (2.7kb $\Delta$ non-conserved LBS) + gcy-5(min)p::2xnl-s-yfp   | pKL131         | 4F            |
| GS9296                                       | <i>arSi81</i>          | lag-1 enhancer (2.7kb $\Delta$ conserved LBS) + gcy-5(min)p::2xnl-s-yfp       | pKL110         | 4G            |
| GS8992                                       | <i>arSi31</i>          | gcy-5(min)p::2xnl-s-yfp                                                       | pKL78          | S4A           |
| GS9353                                       | <i>arSi86</i>          | lag-1p(gene-to-gene 1.4kb)::2xnl-s-yfp                                        | pKL139         | S4B           |
| GS9235                                       | <i>arSi55; jccTi1</i>  | lag-1 enhancer(conserved +400bp) + gcy-5(min)p::2xnl-s-yfp                    | pKL103         | S4C           |
| GS9250                                       | <i>arSi70</i>          | lag-1 enhancer(1.6kb enhancer $\Delta$ non-HOT LBS) + gcy-5(min)p::2xnl-s-yfp | pKL122         | S4D           |
| GS9179                                       | <i>arSi53</i>          | lag-1 enhancer(conserved) + gcy-5(min)p::2xnl-s-yfp                           | pKL96          | S4E           |

**Table S5**

| <b>Primers used in enhancer analysis</b> |                                        |                                                  |
|------------------------------------------|----------------------------------------|--------------------------------------------------|
| <b>Transgene</b>                         | <b>F Primer</b>                        | <b>R Primer</b>                                  |
| <b>arSi35</b>                            | TTCCCATCCTAGTTTTTCCC<br>ACAC           | AAATTCAAATACTGGCATA<br>GAATATATAACTAGTTTTTC      |
| <b>arSi59</b>                            | CGTCATCGTCCTCTGTCCG                    | AAATTCAAATACTGGCATA<br>GAATATATAACTAGTTTTTC      |
| <b>arSi60</b>                            | CGTCATCGTCCTCTGTCCG                    | AAATTCAAATACTGGCATA<br>GAATATATAACTAGTTTTTC      |
| <b>arSi74</b>                            | TTCCCATCCTAGTTTTTCCC<br>ACAC           | AAATTCAAATACTGGCATA<br>GAATATATAACTAGTTTTTC      |
| <b>arSi81</b>                            | TTCCCATCCTAGTTTTTCCC<br>ACAC           | AAATTCAAATACTGGCATA<br>GAATATATAACTAGTTTTTC      |
| <b>arSi31</b>                            | GCAGATACCAACAAGATTAA<br>AACTTCAAAC     | TTTTCATCAGAATAAGTAA<br>TTTTTCGAAAACAATAAAT<br>AG |
| <b>arSi86</b>                            | AACTTTATTTTTAGAAAAGC<br>GAATTTTACCTTCA | CTGAAATTTCTGAATGTTA<br>TTTTCATCAATTATAAC         |
| <b>arSi55</b>                            | AAAATTACATTCCGCACTGC<br>CAG            | TTAGGCTTAGTAATGTTGT<br>TTTCTAAGCC                |
| <b>arSi70</b>                            | CGTCATCGTCCTCTGTCCG                    | AAATTCAAATACTGGCATA<br>GAATATATAACTAGTTTTTC      |
| <b>arSi53</b>                            | CGTCATCGTCCTCTGTCCG                    | TTTCTTAGTACTTTTTCAAT<br>CTTCCCACCAG              |
